# Supplementary material
Source: publisher site journal article supplement (https://www.degruyterbrill.com/publication/journal_key/LING/downloadAsset/LING_Special_Issues_Guidelines_new.pdf)
Supplement: Supplementary file 1 [file LING_Special_Issues_Guidelines_new.pdf]

## **Special Issues of *Linguistics***

### **Submitting a proposal**

*Linguistics* welcomes proposals for special thematic issues.

Special issues should address topics of sufficient breadth to engage a broad segment of the journal's readership. We particularly welcome forward-looking proposals that open new lines of inquiry, introduce novel data or methods, or map emerging problems with clear implications for future research.

Proposals centered on narrowly framed debates lacking a novel perspective are unlikely to be considered.

A proposal should include a working title, a tentative table of contents, a summary of the special issue and the abstracts of the individual contributions. The summary should highlight the originality of the topic and its relevance within the current state of research, with reference to the journal's mission statement. It should also situate each proposed article within the broader thematic framework of the issue.

Each abstract should clearly present the research question(s) that the study addresses, the methods and data used, a concise outline of the analysis, and the principal conclusions.

Proposal can be submitted by e-mail to the Editor-in-Chief of *Linguistics*, Volker Gast, at [linguistics@uni-jena.de](mailto:linguistics@uni-jena.de).

### **Instructions to Editors of Special Issues**

#### **General Comments**

Although special issues of *Linguistics* are often inspired by workshops or conferences, Guest Editors are reminded that a special issue must be conceived as a thematic collection, not as the proceedings of a specific event from which the papers may have originated.

The Editorial Board reserves the right to reject individual contributions from any proposed issue. All submissions are subject to the same rigorous peer-review process as regular articles. This ensures that contributions published in a special issue hold the same scholarly status as standalone journal articles.

Guest Editors should make clear to all contributors that their manuscripts will undergo full refereeing upon submission. The inclusion of a paper in a special issue proposal does not in any way guarantee its acceptance. Editors are therefore expected to conduct a critical internal pre-review and exclude papers that do not meet the journal's standards before submission.

A special issue remains a project under consideration until sufficient high-quality material has been accepted. Only then will the issue be assigned a volume and issue

number. If a special issue cannot be published as planned, *Linguistics* may publish any accepted articles in regular, non-thematic issues.

All articles will be reviewed by at least two independent referees. Referees are selected by mutual agreement between the Editorial Board and the Guest Editors: one referee is proposed by the Editorial Board, and one by the Guest Editors. The review process follows a double-blind procedure. Editorial decisions are made jointly by the Editorial Board and the Guest Editors. In cases where a consensus cannot be reached, the final decision rests with the Editorial Board.

### **Submitting the submissions**

Manuscripts are submitted through the journal's online submission system, ScholarOne (<https://mc.manuscriptcentral.com/ling>). In the cover letter, authors should indicate that their manuscript is being submitted as part of a special issue. Guest Editors are asked to ensure that all contributors are familiar with the style and formatting requirements specified by the journal and its publisher, De Gruyter Brill. Detailed guidelines can be found in the journal's *Instructions for Authors* and accompanying *Style Sheet*, available on the journal's website (<https://www.degruyterbrill.com/journal/key/ling>).

### **Guidelines for volume length:**

*Linguistics* currently publishes approximately 1400 pages per year in a volume of 6 issues. The ideal length of an issue is, therefore, around 230 pages, but issue length may vary from 180–240 pages.

(1 page of printed *Linguistics* corresponds to ~ 3,000 characters (~ 475 words), making an average 230-page issue of *Linguistics* ~690,000 characters / ~109,250 words.)

### **Please note:**

Once an issue has been accepted and scheduled for production, all contributions may be additionally copyedited to conform to journal style if necessary. Authors will receive PDF page proofs for correction, which must be returned by dates determined by the publication schedule. Other than the correction of typos, no other changes to the text may be made at that stage.

### **Who to contact during the submission process:**

Guest editors are encouraged to address any questions regarding the issue to the *Linguistics* editorial office:

*Linguistics* Editorial Office  
Department of English and American Studies  
University of Jena  
Ernst-Abbe-Platz 8  
D-07743 Jena  
Germany  
[linguistics@uni-jena.de](mailto:linguistics@uni-jena.de)
